# Supplementary material for: Mesozooplankton structure and functioning in the western tropicalSouth Pacific along the 20° parallel south during the OUTPACEsurvey (February–April 2015)
Source: Copernicus journal article supplement (doi:10.5194/bg-2017-573), 2018-03-19
Supplement: Supplementary file 1 [file bg-2017-573-supplement.pdf]

## Supplementary table

**Table S1** List of zooplanktonic taxa collected and identified during the 2015 OUTPACE cruise with average percentage of abundance within the 0-200 upper meters of the water column in the four Clusters defined in the PCA analysis on environmental variables. W-MA = Western Melanesian archipelago, CE-MA= Central and Eastern Melanesian archipelago, BL = station B, blooming conditions, and GY = subtropical gyre.

|                                  | W-MA  | CE-MA | BL    | GY    |                                | W-MA  | CE-MA | BL    | GY    |
|----------------------------------|-------|-------|-------|-------|--------------------------------|-------|-------|-------|-------|
| <b>COPEPODS</b>                  |       |       |       |       | <b>COPEPODS (follow)</b>       |       |       |       |       |
| Copepod nauplii                  | 10.02 | 8.96  | 9.63  | 9.22  | <i>Phaenna spinifera</i>       | 0.01  |       |       |       |
| Undetermined copepodites         | 0.01  |       |       |       | <i>Pleuromamma</i>             | 0.09  | 0.72  | 0.81  | 1.64  |
| <i>Acartia</i>                   | 0.76  | 0.95  | 0.12  | 0.65  | <i>Sapphirina</i>              | 0.05  | 0.06  | 0.05  | 0.10  |
| <i>Aetideus</i>                  |       | 0.04  |       |       | <i>Scaphocalanus</i>           | 0.01  | 0.03  |       |       |
| <i>Calanidae</i>                 | 1.44  | 1.70  | 1.73  | 1.25  | <i>Scolecithrix</i>            | 0.09  | 0.26  |       | 0.00  |
| <i>Calanopia</i>                 | 0.05  | 0.38  | 0.55  | 0.21  | <i>Scottocalanus</i>           |       | 0.00  |       |       |
| <i>Calanus</i>                   | 0.17  | 0.08  | 0.13  | 0.01  | <i>Subeucalanus / Eucalanu</i> | 0.09  | 0.01  |       |       |
| <i>Calocalanus</i>               | 2.68  | 1.81  | 1.34  | 1.53  | <i>Temora</i>                  | 0.60  | 0.34  | 0.33  | 0.07  |
| <i>Candacia</i>                  | 0.27  | 0.33  | 0.36  | 0.42  | <b>OTHER CRUSTACEANS</b>       |       |       |       |       |
| <i>Centropages</i>               | 0.05  | 0.03  |       | 0.04  | Amphipoda                      | 0.02  | 0.01  | 0.15  | 0.04  |
| <i>Clausocalanus/Paracalanus</i> | 18.83 | 17.28 | 16.04 | 24.70 | Euphausiacea                   | 0.18  | 0.37  | 0.39  | 0.22  |
| <i>Clytemnestra</i>              | 0.01  | 0.03  | 0.03  |       | Lucifer                        | 0.01  | 0.06  |       |       |
| <i>Copilia</i>                   | 0.17  | 0.12  | 0.17  | 0.14  | Ostracoda                      | 2.01  | 2.38  | 4.26  | 2.22  |
| <i>Corycaeus</i>                 | 5.29  | 4.20  | 3.04  | 8.90  | Pseudoevadne                   | 0.04  |       |       | 0.34  |
| <i>Cosmocalanus darwini</i>      |       |       | 0.05  |       | <b>GELATINOUS</b>              |       |       |       |       |
| <i>Ctenocalanus</i>              |       | 0.12  |       |       | Appendicularia                 | 15.00 | 13.34 | 11.90 | 11.44 |
| <i>Cyclopoida</i>                |       | 0.01  |       | 0.03  | Doliole                        | 0.18  | 0.09  | 0.39  | 0.21  |
| <i>Eucalanus</i>                 | 0.08  | 0.17  | 1.23  | 0.33  | Salpidae                       | 0.14  | 0.10  | 0.08  | 0.30  |
| <i>Euchaeta/Paraeuchaeta</i>     | 0.06  | 0.10  | 0.03  | 0.07  | Siphonophora                   | 0.24  | 0.26  | 0.14  | 0.24  |
| <i>Euterpina acutifrons</i>      | 0.02  | 0.06  |       |       | Hydrozoa                       | 0.06  | 0.06  | 0.19  | 0.04  |
| <i>Haloptilus</i>                | 0.25  | 0.30  | 0.56  | 0.33  | <b>CHAETOGNATHA</b>            | 2.13  | 2.56  | 1.98  | 0.60  |
| <i>Harpacticoida</i>             | 0.01  |       |       |       | <b>MOLLUSCS</b>                |       |       |       |       |
| <i>Heterorhabdus</i>             | 0.05  | 0.08  | 0.05  | 0.14  | Thecosomata                    | 5.29  | 3.81  | 2.24  | 1.95  |
| <i>Lubbockia</i>                 | 0.10  | 0.07  | 0.24  | 0.10  | <b>MEROPLANKTON</b>            |       |       |       |       |
| <i>Lucicutia</i>                 | 1.11  | 1.27  | 1.54  | 1.41  | Decapod larvae                 | 0.01  | 0.12  |       |       |
| <i>Macrosetella gracilis</i>     | 0.11  | 0.05  | 0.73  | 0.03  | Cephalopod larvae              | 0.02  |       |       |       |
| <i>Mecynocera clausi</i>         | 1.20  | 1.64  | 1.17  | 2.03  | Cirripedia larvae              |       | 0.01  |       |       |
| <i>Mesocalanus/Neocalanus</i>    | 0.08  | 0.05  | 0.18  | 0.07  | Echinoderm larvae              |       | 0.02  | 0.03  |       |
| <i>Microsetella</i>              | 3.08  | 4.13  | 4.38  | 2.83  | Lamellibranch larvae           | 0.17  | 0.41  | 0.12  | 0.32  |
| <i>Miracia efferata</i>          | 0.01  | 0.05  | 0.08  |       | Gasteropod larvae              |       |       | 0.08  |       |
| <i>Mormonilla/Neomormonilla</i>  | 0.08  | 0.23  | 0.13  | 0.12  | Polychaets larvae              | 0.28  | 0.21  | 0.51  | 0.43  |
| <i>Nannocalanus minor</i>        | 0.32  | 0.36  | 0.05  | 0.04  | Teleostei eggs                 |       | 0.06  |       |       |
| <i>Oithona</i>                   | 12.90 | 15.89 | 13.16 | 13.54 | Teleostei larvae               |       | 0.03  | 0.03  | 0.00  |
| <i>Oncaea</i>                    | 13.88 | 14.10 | 19.53 | 11.65 | Branchiostoma                  | 0.01  |       |       |       |
| <i>Paracalanus</i>               | 0.13  | 0.03  | 0.05  | 0.03  | Larvae unknown                 | 0.05  | 0.05  | 0.05  | 0.07  |
